# Supplementary material for: Modified dorsal recumbent position versus lithotomy position for flexible ureteroscopic lithotomy: a multicenter prospective randomized controlled clinical trial
Source: PubMed Central journal article supplement — Transl Androl Urol. 2024 Aug 26;13(8):1388–94. doi: 10.21037/tau-24-3 (PMC11399044; doi:10.21037/tau-24-3), 2024-08-26
Supplement: tau-13-08-1388-dss.pdf [file tau-13-08-1388-dss.pdf]

## Data Sharing Statement

|                     |                                                                                                                                                     |                                                                                                                                                                                                                              |
|---------------------|-----------------------------------------------------------------------------------------------------------------------------------------------------|------------------------------------------------------------------------------------------------------------------------------------------------------------------------------------------------------------------------------|
| <b>Article Info</b> | <a href="https://dx.doi.org/10.21037/tau-24-3">https://dx.doi.org/10.21037/tau-24-3</a>                                                             |                                                                                                                                                                                                                              |
| <b>Item</b>         | <b>Question</b>                                                                                                                                     | <b>Authors' Response<br/>(place "-" if not applicable)</b>                                                                                                                                                                   |
| 1                   | Would you like to share data collected for your study to others?                                                                                    | Yes.                                                                                                                                                                                                                         |
| 2                   | If not, would you like to share the reason for your decision?                                                                                       | -                                                                                                                                                                                                                            |
| 3                   | What data in particular will be shared?                                                                                                             | Data of the body positioning time, operation time, the time from the bladder neck to the ureteral orifice of the flexible ureteroscope spent by the doctors, incidence rate of patient's lower limb soreness will be shared. |
| 4                   | Any other documents will be shared? Such as study protocol, statistical analysis plan, informed consent form, clinical study report, analytic code. | Statistical analysis plan, informed consent form, and clinical study report will also be shared if requested.                                                                                                                |
| 5                   | When will data availability begin?                                                                                                                  | From the publication date.                                                                                                                                                                                                   |
| 6                   | When will data availability end?                                                                                                                    | The data may undergo slight modifications as the technology of flexible ureteroscopic lithotomy continues to advance.                                                                                                        |
| 7                   | To whom will you share the data?                                                                                                                    | Urological specialist nurses with a keen interest in surgical care for flexible ureteroscopic lithotomy.                                                                                                                     |
| 8                   | For what type of analysis or purpose?                                                                                                               | The aim of this study is to analyze and evaluate the comparison between the modified dorsal recumbent position versus lithotomy position for flexible ureteroscopic lithotomy.                                               |
| 9                   | How or where can the data/documents be obtained?                                                                                                    | Emails could be sent to the address below to obtain the shared data: cao.lina@zs-hospital.sh.cn                                                                                                                              |
| 10                  | Any other restrictions?                                                                                                                             | We may balance the potential benefits and risks for each request and then provide the data that could be shared.                                                                                                             |
