# Supplementary material for: Modified dorsal recumbent position versus lithotomy position for flexible ureteroscopic lithotomy: a multicenter prospective randomized controlled clinical trial
Source: PubMed Central journal article supplement — Transl Androl Urol. 2024 Aug 26;13(8):1388–94. doi: 10.21037/tau-24-3 (PMC11399044; doi:10.21037/tau-24-3), 2024-08-26
Supplement: tau-13-08-1388-prf.pdf [file tau-13-08-1388-prf.pdf]

## Peer Review File

Article information: <https://dx.doi.org/10.21037/tau-24-3>

### Reviewer A

There are a lot of variables cannot be measured objectively, due to the nature of the variables , even if the study is conducted in one center and performed by one team. Their performance will be different from case to case and form one day to another day. As an example: the time from bladder neck to the ureteric orifice will be dependent from the surgeon experience and not from the position of the patient.

Reply: Although the time from bladder neck to the ureteric orifice will be dependent from the surgeon experience and not from the position of the patient. But we also take into account this issue prior to commencing the project, thus ensuring that our clinical trials are conducted by a consistent group of doctors who perform the operations. Furthermore, we have communicated all project requirements to every member involved before initiation, aiming to mitigate potential data bias resulting from disparities in experience and surgical practices among doctors and nurses across different groups.

### Reviewer B

#### Abstract

The abstract is concise. All the necessary information about the study is included.

#### Introduction

- The information provided in the introduction is vital for the comprehension of the manuscript.
- The objective of the study is clearly mentioned in the last paragraph.

#### Methods

- The study design including the inclusion and exclusion criteria is analyzed.
- The data collection and analysis are correctly mentioned.
- The MDRP and conventional positioning techniques are sufficiently explained.
- The statistical analysis is adequately explained.

#### Results

- The results are presented in an extensive way.

- The figures and tables are really helpful and necessary for the completion of the author's work.

#### Discussion

- The discussion is of good quality and includes updated data.

- The authors inform extensively the reader about the study limitations.

#### Conclusion

From the presented data, the conclusion is complete and represents the work that the authors did.

Reply: We sincerely appreciate the experts' esteemed evaluation, which serves as a significant source of encouragement and recognition for our entire team. Furthermore, it instills in us the impetus to further investigate the role of patients in future urology operating room nursing, with the ultimate goal of enhancing their safety, comfort, and medical service efficiency.
